# Supplementary material for: Risk Factors Predisposing to Angina in Patients with Non-Obstructive Coronary Arteries: A Retrospective Analysis
Source: MDPI journal article supplement (doi:10.3390/jpm12071049), 2022-06-27
Supplement: s1 [file s1]

## Supplementary material

**Table S1.** Univariable logistic regression analysis—numerical values.

| Parameter                      | OR    | 95% CI        | p-value |
|--------------------------------|-------|---------------|---------|
| Age                            | 0.979 | 0.958 – 1.001 | p=0.058 |
| BMI                            | 0.996 | 0.949 – 1.044 | p=0.861 |
| Female sex**                   | 2.00  | 1.201 – 3.332 | p=0.008 |
| Living on the countryside      | 0.634 | 0.375 – 1.072 | p=0.089 |
| Arterial hypertension***       | 0.178 | 0.089 – 0.354 | p<0.001 |
| Diabetes mellitus (all types)* | 0.548 | 0.321 – 0.938 | p=0.028 |
| Diabetes mellitus type 2       | 0.584 | 0.339 – 1.005 | p=0.052 |
| Heart failure                  | 1.020 | 0.604 – 1.721 | p=0.941 |
| Family history of CVD          | 1.119 | 0.654 – 1.914 | p=0.681 |
| TC*                            | 1.239 | 1.023 – 1.500 | p=0.028 |
| LDL-C**                        | 1.436 | 1.134 – 1.818 | p=0.003 |
| HDL-C                          | 1.161 | 0.654 – 2.059 | p=0.611 |
| non-HDL-C*                     | 1.250 | 1.021 – 1.531 | p=0.031 |
| LDL-C/HDL-C**                  | 1.513 | 1.132 – 2.022 | p=0.005 |
| non-HDL-C/HDL-C*               | 1.241 | 1.001 – 1.538 | p=0.049 |
| TG                             | 0.919 | 0.701 – 1.205 | p=0.541 |
| cTnI                           | 1.032 | 0.918 – 1.160 | p=0.603 |
| hs-CRP                         | 0.992 | 0.974 – 1.010 | p=0.357 |
| EF                             | 1.024 | 0.999 – 1.049 | p=0.065 |
| LVEDD                          | 0.985 | 0.955 – 1.016 | p=0.337 |

\*p<0.05; \*\*p<0.01; \*\*\*p<0.001

BMI—body mass index; cTnI—cardiac troponin I; CVD—cardiovascular diseases; EF—ejection fraction; HDL-C—high-density lipoprotein cholesterol; hs-CRP—high-sensitive C-reactive protein; LDL-C—low-density lipoprotein cholesterol; LVEDD—left ventricle end-diastolic diameter; non-HDL-C—non-high-density lipoprotein cholesterol; TC—total cholesterol; TG—triglycerides.

An additional analysis regarding only patients with hemodynamically significant lesions in one or multiple coronary arteries has been performed. The results of the analysis are presented in Tables S2-S5.

We found that the median BMI was significantly higher in the group with only one obstructed coronary artery and the multivariable regression analysis revealed that BMI could be recognized as an independent risk factor, decreasing the risk for multiple lesions (OR=0.908, 95%CI: 0.832 – 0.990; p=0.030). This unexpected result might fit into the pattern that the lower severity of CAD, the more underestimation from the patients and doctors it has, same as we presented in the case of the lipid profile in our work. Furthermore, the past myocardial infarction or past PCI were unsurprisingly reported more frequently in the multiple obstructed coronary arteries group and were both considered the independent risk factors (OR=2.433 and OR=3.084, respectively). Notably, we observed that the use of mineralocorticoid receptor antagonists (MRA) was more common in the group with multiple coronary arteries obstructed, albeit there were no statistically significant differences in the prevalence of heart failure or hypertension. Interestingly, statin therapy did not differ between the groups.

**Table S2.** Additional OCAD group analysis: population characteristics.  
Group 1—only one coronary artery obstructed; group 2—multiple coronary arteries obstructed.

| Parameter                             | Group 1<br><i>N (% value) or<br/>median (q1–q3)</i> | Group 2<br><i>N (% value) or<br/>median (q1–q3)</i> | p-value |
|---------------------------------------|-----------------------------------------------------|-----------------------------------------------------|---------|
| Number of participants                | 72 (100%)                                           | 56 (100%)                                           |         |
| <i>Personal characteristics</i>       |                                                     |                                                     |         |
| Gender (females)                      | 24 (33%)                                            | 14 (25%)                                            | p=0.368 |
| Living in the countryside/in the city | 22/50 (31%/69%)                                     | 23/33 (41%/59%)                                     | p=0.188 |
| Age                                   | 68.00 (59.00–75.00)                                 | 69.00 (63.00–75.00)                                 | p=0.334 |
| BMI (kg/m <sup>2</sup> )**            | 29.38 (26.32–33.33)                                 | 27.07 (24.46–30.48)                                 | p=0.008 |
| <i>Comorbidities</i>                  |                                                     |                                                     |         |
| Arterial hypertension                 | 66 (92%)                                            | 51 (91%)                                            | p=0.919 |
| Diabetes mellitus (all types)         | 25 (35%)                                            | 21 (38%)                                            | p=0.652 |
| DM2                                   | 23 (32%)                                            | 20 (36%)                                            | p=0.562 |
| Heart failure                         | 20 (28%)                                            | 18 (32%)                                            | p=0.497 |
| Past myocardial infarction**          | 18 (25%)                                            | 29 (52%)                                            | p=0.002 |
| Past PCI (at least one)***            | 25 (35%)                                            | 38 (68%)                                            | p<0.001 |
| Family history of CVD                 | 36 (56%)                                            | 26 (59%)                                            | p=0.769 |
|                                       | Total N: 64 (100%) <sup>a</sup>                     | Total N: 44 (100%) <sup>a</sup>                     |         |
| <i>Addictions</i>                     |                                                     |                                                     |         |
| <i>Alcohol consumption</i>            | Total N: 52 (100%) <sup>a</sup>                     | Total N: 32 (100%) <sup>a</sup>                     |         |
| No                                    | 44 (85%)                                            | 26 (81%)                                            | p=0.610 |
| Occasionally                          | 7 (13%)                                             | 6 (19%)                                             |         |
| Frequently                            | 1 (2%)                                              | 0 (0%)                                              |         |
| <i>Smoking</i>                        | Total N: 66 (100%) <sup>a</sup>                     | Total N: 44 (100%) <sup>a</sup>                     |         |
| Never                                 | 33 (50%)                                            | 21 (48%)                                            | p=0.749 |
| Active smoker                         | 14 (21%)                                            | 8 (18%)                                             |         |
| Smoking in the past                   | 19 (29%)                                            | 15 (34%)                                            |         |

\*p<0.05; \*\*p<0.01; \*\*\*p<0.001

<sup>a</sup> In the case of family history of CVD, alcohol consumption, and smoking, the total N differs from the number of participants in each group due to the missing information in medical records.

BMI—body mass index; CVD—cardiovascular disease; DM2—type 2 diabetes mellitus; OCAD—obstructive coronary artery disease; PCI—percutaneous coronary intervention.

**Table S3.** Additional OCAD group analysis: laboratory and echocardiographic parameters.  
Group 1—only one coronary artery obstructed; group 2—multiple coronary arteries obstructed.

| Parameter                                            | Unit               | Group 1<br><i>median (q1–q3)</i> | Group 2<br><i>median (q1–q3)</i> | p-value |
|------------------------------------------------------|--------------------|----------------------------------|----------------------------------|---------|
| <i>Lipid parameters</i>                              |                    |                                  |                                  |         |
| TC                                                   | mmol/L             | 4.06 (3.40–5.03)                 | 4.35 (3.59–4.98)                 | p=0.545 |
| LDL-C                                                | mmol/L             | 2.10 (1.50–2.80)                 | 2.10 (1.60–2.60)                 | p=0.958 |
| HDL-C                                                | mmol/L             | 1.44 (1.21–1.57)                 | 1.31 (1.06–1.68)                 | p=0.180 |
| Non-HDL-C                                            | mmol/L             | 2.62 (2.06–3.27)                 | 2.95 (2.30–3.53)                 | p=0.407 |
| TG                                                   | mmol/L             | 1.14 (0.76–1.52)                 | 1.26 (0.85–1.80)                 | p=0.264 |
| LDL-C/HDL-C ratio                                    | 1                  | 1.49 (1.09–1.88)                 | 1.55 (1.23–2.13)                 | p=0.373 |
| Non-HDL-C/HDL-C ratio                                | 1                  | 1.91 (1.42–2.46)                 | 2.09 (1.46–2.73)                 | p=0.128 |
| <i>White blood parameters and C-reactive protein</i> |                    |                                  |                                  |         |
| White blood count                                    | 10 <sup>9</sup> /L | 7.31 (6.32–9.11)                 | 6.76 (5.41–8.29)                 | p=0.126 |

|                                     |                    |                     |                     |         |
|-------------------------------------|--------------------|---------------------|---------------------|---------|
| Neutrophil count                    | 10 <sup>9</sup> /L | 5.00 (3.97–6.14)    | 4.19 (3.20–6.08)    | p=0.208 |
| Eosinophil count                    | 10 <sup>9</sup> /L | 0.13 (0.08–0.21)    | 0.12 (0.07–0.21)    | p=0.513 |
| Basophil count                      | 10 <sup>9</sup> /L | 0.03 (0.02–0.04)    | 0.03 (0.02–0.04)    | p=0.254 |
| Lymphocyte count                    | 10 <sup>9</sup> /L | 1.76 (1.29–1.96)    | 1.48 (1.19–1.79)    | p=0.089 |
| Monocyte count                      | 10 <sup>9</sup> /L | 0.44 (0.37–0.54)    | 0.41 (0.32–0.49)    | p=0.188 |
| NLR                                 | 1                  | 2.73 (2.26–3.89)    | 3.06 (2.17–4.47)    | p=0.778 |
| LMR                                 | 1                  | 3.72 (2.90–4.59)    | 3.73 (2.54–4.57)    | p=0.800 |
| hs-CRP                              | mg/L               | 4.90 (3.20–7.90)    | 5.40 (1.80–6.90)    | p=0.307 |
| <i>Troponins</i>                    |                    |                     |                     |         |
| cTnI                                | ng/mL              | 0.000 (0.000–0.011) | 0.002 (0.000–0.018) | p=0.456 |
| <i>Echocardiographic parameters</i> |                    |                     |                     |         |
| EF                                  | %                  | 55.00 (50.00–60.00) | 55.00 (47.50–60.00) | p=0.875 |
| LA diameter                         | mm                 | 43.00 (40.00–46.00) | 42.00 (37.50–48.00) | p=0.723 |
| LVEDD                               | mm                 | 51.00 (47.00–55.00) | 53.00 (47.50–57.00) | p=0.390 |
| RVD                                 | mm                 | 32.00 (30.00–35.00) | 33.00 (30.00–35.00) | p=0.936 |
| IVS thickness                       | mm                 | 11.00 (10.00–12.00) | 11.00 (10.00–13.00) | p=0.645 |
| PW thickness                        | mm                 | 11.00 (10.00–12.00) | 11.00 (10.00–12.00) | p=0.881 |

\*p<0.05; \*\*p<0.01; \*\*\*p<0.001

cTnI—cardiac troponin I; EF—ejection fraction; HDL-C—high-density lipoprotein cholesterol; hs-CRP—high-sensitive C-reactive protein; IVS—interventricular septum; LA—left atrium; LDL-C—low-density lipoprotein cholesterol; LMR—lymphocyte/monocyte ratio; LVEDD—left ventricle end-diastolic diameter; NLR—neutrophil/lymphocyte ratio; non-HDL-C—non-high-density lipoprotein cholesterol; OCAD—obstructive coronary artery disease; PW—posterior wall; RVD—right ventricle diameter; TC—total cholesterol; TG—triglycerides.

**Table S4.** Additional OCAD group analysis: univariable and multivariable logistic regression. Group 1—only one coronary artery obstructed; group 2—multiple coronary arteries obstructed (modelled class).

| Univariable logistic regression analysis                |       |               |         |
|---------------------------------------------------------|-------|---------------|---------|
| Parameter                                               | OR    | 95% CI        | p-value |
| Age                                                     | 1.017 | 0.981-1.054   | p=0.361 |
| BMI**                                                   | 0.896 | 0.825-0.974   | p=0.009 |
| Female sex                                              | 0.698 | 0.318-1.530   | p=0.369 |
| Living on the countryside                               | 0.609 | 0.290-1.278   | p=0.190 |
| Arterial hypertension                                   | 0.938 | 0.270-3.250   | p=0.919 |
| Diabetes mellitus (all types)                           | 1.184 | 0.568-2.468   | p=0.653 |
| Diabetes mellitus type 2                                | 1.247 | 0.591-2.629   | p=0.562 |
| Heart failure                                           | 1.306 | 0.604-2.824   | p=0.498 |
| Past myocardial infarction**                            | 3.233 | 1.512-6.915   | p=0.003 |
| Past PCI (at least one)***                              | 3.940 | 1.863-8.331   | p<0.001 |
| Family history of CVD                                   | 1.123 | 0.516-2.446   | p=0.769 |
| TC                                                      | 0.969 | 0.726-1.293   | p=0.831 |
| LDL-C                                                   | 0.891 | 0.616-1.289   | p=0.540 |
| HDL-C                                                   | 0.507 | 0.201-1.280   | p=0.150 |
| non-HDL-C                                               | 1.048 | 0.764-1.437   | p=0.772 |
| LDL-C/HDL-C                                             | 1.294 | 0.786-2.129   | p=0.311 |
| non-HDL-C/HDL-C                                         | 1.431 | 0.979-2.092   | p=0.064 |
| TG                                                      | 1.462 | 0.969-2.206   | p=0.070 |
| cTnI                                                    | 0.015 | 0.000-999.9   | p=0.603 |
| hs-CRP                                                  | 0.818 | 0.529-1.263   | p=0.364 |
| EF                                                      | 0.996 | 0.957-1.036   | p=0.834 |
| LVEDD                                                   | 1.013 | 0.961-1.069   | p=0.627 |
| Multivariable logistic regression analysis <sup>a</sup> |       |               |         |
| Parameter                                               | OR    | 95% CI        | p-value |
| <i>Model 1</i>                                          |       |               |         |
| BMI*                                                    | 0.908 | 0.832 – 0.990 | p=0.030 |
| Past PCI (at least one)**                               | 3.084 | 1.421 – 6.693 | p=0.004 |
| <i>Model 2</i>                                          |       |               |         |
| BMI*                                                    | 0.909 | 0.835 – 0.991 | p=0.030 |
| Past myocardial infarction*                             | 2.433 | 1.105 – 5.359 | p=0.027 |

\*p<0.05; \*\*p<0.01; \*\*\*p<0.001

<sup>a</sup> Because past PCI and past myocardial infarction appeared collinear, two different regression models were created.

BMI—body mass index; cTnI—cardiac troponin I; CVD—cardiovascular diseases; EF—ejection fraction; HDL-C—high-density lipoprotein cholesterol; hs-CRP—high-sensitive C-reactive protein; LDL-C—low-density lipoprotein cholesterol; LVEDD—left ventricle end-diastolic diameter; non-HDL-C—non-high-density lipoprotein cholesterol; PCI—percutaneous coronary intervention; TC—total cholesterol; TG—triglycerides.

**Table S5.** Additional OCAD group analysis: summary of pre-hospital medications.  
Group 1—only one coronary artery obstructed; group 2—multiple coronary arteries obstructed.

| Medicine                                   | Number of participants    |              | p-value |
|--------------------------------------------|---------------------------|--------------|---------|
|                                            | N (% value)               |              |         |
|                                            | Total N: 125 <sup>a</sup> |              |         |
|                                            | Group 1                   | Group 2      |         |
|                                            | N: 70 (100%)              | N: 55 (100%) |         |
| ACE-I / ARB                                | 60 (85.71%)               | 42 (76.36%)  | p=0.180 |
| Acetylsalicylic Acid                       | 46 (65.71%)               | 34 (61.82%)  | p=0.652 |
| b-Blockers                                 | 48 (68.57%)               | 44 (80.00%)  | p=0.150 |
| Ca-blockers                                | 23 (32.86%)               | 22 (40.00%)  | p=0.409 |
| Diuretics<br>(thiazides + loop diuretics)  | 37 (52.86%)               | 26 (47.27%)  | p=0.535 |
| Metformin                                  | 16 (22.86%)               | 16 (29.09%)  | p=0.428 |
| MRA*                                       | 10 (14.29%)               | 18 (32.73%)  | p=0.014 |
| Nitrates                                   | 6 (8.57%)                 | 5 (9.09%)    | p=0.919 |
| Statins                                    | 58 (82.86%)               | 46 (83.64%)  | p=0.908 |
| Approximate atorvastatin dose <sup>b</sup> | 40 (20–60)                | 40 (20–40)   | p=0.118 |
| >20 mg/d                                   | 27 (38.57%)               | 29 (52.73%)  | p=0.114 |
| ≤20 mg/d                                   | 43 (61.43%)               | 26 (47.27%)  | p=0.114 |
| Trimetazidine                              | 11 (15.71%)               | 6 (10.91%)   | p=0.437 |
| NOAC                                       | 7 (10.00%)                | 6 (10.91%)   | p=0.869 |
| VKA                                        | 5 (7.14%)                 | 2 (3.64%)    | p=0.694 |

\*p<0.05; \*\*p<0.01; \*\*\*p<0.001

<sup>a</sup> The total N differs from the number of participants in each group due to the missing information in medical records.

<sup>b</sup> Calculation based on [30].

ACE-I—angiotensin-converting enzyme inhibitors; ARB—angiotensin II receptor blockers; MRA—mineralocorticoid receptor antagonists; NOAC—novel oral anticoagulants; OCAD—obstructive coronary artery disease; VKA—vitamin K antagonists.
